# Supplementary material for: Emergence of low-symmetry foldamers from single monomers
Source: Springer Nature journal article supplement (doi:10.1038/s41557-020-00565-2), 2020-11-20
Supplement: 41557_2020_565_MOESM35_ESM.mol [file 41557_2020_565_MOESM35_ESM.mol]

nchem.19122537B-comp4d.mol
  ChemDraw09082019062D

 32 33  0  0  1  0  0  0  0  0999 V2000
    3.2151   -1.1682    0.0000 O   0  0  0  0  0  0  0  0  0  0  0  0
    3.9295    0.0693    0.0000 O   0  0  0  0  0  0  0  0  0  0  0  0
    2.5006    0.8944    0.0000 C   0  0  0  0  0  0  0  0  0  0  0  0
    3.2151   -0.3432    0.0000 C   0  0  0  0  0  0  0  0  0  0  0  0
    2.5006    0.0693    0.0000 C   0  0  0  0  0  0  0  0  0  0  0  0
    0.8265   -2.5181    0.0000 C   0  0  0  0  0  0  0  0  0  0  0  0
    1.4510   -3.0572    0.0000 C   0  0  0  0  0  0  0  0  0  0  0  0
    2.2302   -2.7862    0.0000 C   0  0  0  0  0  0  0  0  0  0  0  0
    2.3854   -1.9761    0.0000 C   0  0  0  0  0  0  0  0  0  0  0  0
    1.7609   -1.4369    0.0000 C   0  0  0  0  0  0  0  0  0  0  0  0
    0.9817   -1.7079    0.0000 C   0  0  0  0  0  0  0  0  0  0  0  0
    1.7861   -0.3432    0.0000 N   0  0  0  0  0  0  0  0  0  0  0  0
    1.0717    0.8944    0.0000 O   0  0  0  0  0  0  0  0  0  0  0  0
    1.0717    0.0693    0.0000 C   0  0  0  0  0  0  0  0  0  0  0  0
    0.3572   -1.1682    0.0000 C   0  0  0  0  0  0  0  0  0  0  0  0
    0.3572   -0.3432    0.0000 C   0  0  0  0  0  0  0  0  0  0  0  0
   -0.3572    0.0693    0.0000 N   0  0  0  0  0  0  0  0  0  0  0  0
   -1.0717   -1.1682    0.0000 O   0  0  0  0  0  0  0  0  0  0  0  0
   -1.0717   -0.3432    0.0000 C   0  0  0  0  0  0  0  0  0  0  0  0
   -3.9295   -0.3432    0.0000 S   0  0  0  0  0  0  0  0  0  0  0  0
   -2.5006    2.1319    0.0000 S   0  0  0  0  0  0  0  0  0  0  0  0
   -2.5006   -0.3432    0.0000 C   0  0  0  0  0  0  0  0  0  0  0  0
   -1.7861    0.0693    0.0000 C   0  0  0  0  0  0  0  0  0  0  0  0
   -1.7861    0.8944    0.0000 C   0  0  0  0  0  0  0  0  0  0  0  0
   -2.5006    1.3069    0.0000 C   0  0  0  0  0  0  0  0  0  0  0  0
   -3.2151    0.8944    0.0000 C   0  0  0  0  0  0  0  0  0  0  0  0
   -3.2151    0.0693    0.0000 C   0  0  0  0  0  0  0  0  0  0  0  0
    3.2151    1.3069    0.0000 C   0  0  0  0  0  0  0  0  0  0  0  0
    3.2151    2.1319    0.0000 C   0  0  0  0  0  0  0  0  0  0  0  0
    3.9295    2.5444    0.0000 C   0  0  0  0  0  0  0  0  0  0  0  0
    3.9295    3.3695    0.0000 N   0  0  0  0  0  0  0  0  0  0  0  0
    2.8134   -3.3695    0.0000 N   0  0  0  0  0  0  0  0  0  0  0  0
  4  1  2  0      
  4  2  1  0      
  5  3  1  1      
  5  4  1  0      
 12  5  1  0      
  6 11  1  0      
  7  6  2  0      
  8  7  1  0      
  9  8  2  0      
 10  9  1  0      
 11 10  2  0      
 15 11  1  0      
 14 12  1  0      
 14 13  2  0      
 16 14  1  0      
 16 15  1  6      
 17 16  1  0      
 19 17  1  0      
 19 18  2  0      
 23 19  1  0      
 27 20  1  0      
 25 21  1  0      
 22 27  1  0      
 23 22  2  0      
 24 23  1  0      
 25 24  2  0      
 26 25  1  0      
 27 26  2  0      
  3 28  1  0      
 28 29  1  0      
 29 30  1  0      
 30 31  1  0      
  8 32  1  0      
M  END
